# Supplementary material for: Dinuclear cobalt complexes with a redox active biphenyl bridging ligand [Co2(BP)(tqa)2](PF6)2 (H4BP = 4,4′-bis(3-tert-butyl-1,2-catechol), tqa = tris(2-quinolylmethyl)amine): structure and magnetic properties
Source: Royal Society of Chemistry journal article supplement (doi:10.1039/d1dt00995h), 2021-01-01
Supplement: d1dt00995h1.pdf [file d1dt00995h1.pdf]

solution of sodium carbonate (21.0 mmol, 2.226 g) and compound **6** (1.281 g, 4.29 mmol) under an Ar atmosphere. The resultant solution was stirred and refluxed at 110°C overnight. The reaction mixture was cooled to room temperature and filtered. The obtained solution was extracted by toluene (50 mL×3) and washed by brine solution (100 mL×1). The obtained organic layer was dried over with sodium sulfate and concentrated under vacuum. The resultant crude product was purified by column chromatography (silica gel: 250 mL, hexane: ethyl acetate = 10:1→ 3:1) and compound **7** was obtained as orange oil (1.444 g, 2.85 mmol, yields 68%).

Compound **7** (1.444 g, 2.85 mmol) was dissolved in methanol (30 mL) in a 100 mL flask. Conc. HCl (2 mL) was added and stirred for 3 hours at room temperature. After that, saturated NaHCO<sub>3</sub> aq. (50 mL) was added. This solution was extracted with diethyl ether (50 mL). This obtained water phase was neutralized used 1M-HCl and extracted with diethyl ether 50 mL and combined former obtained organic phase. The combined organic phase was washed with brine solution (100 mL) and dried over with Na<sub>2</sub>SO<sub>4</sub> and concentrated under reduced pressure. Obtained brown powder washed with hexane (100 mL), so H<sub>4</sub>BP was obtained as pale brown powder without further purification (0.641 g, 1.96 mmol, yields 69%). <sup>1</sup>H-NMR (400 MHz, CD<sub>3</sub>OD, ppm, Figure S1) 1.41(s, 9H), 6.82(d, 1H), 6.84(d, 1H).

(Reference)

1. Y. Suenaga, Y. Umehata, Y. Hirano, T. Minematsu, C. G. Pierpont, *Inorg. Chim. Acta*, 2008, **361**, 2941-2949.

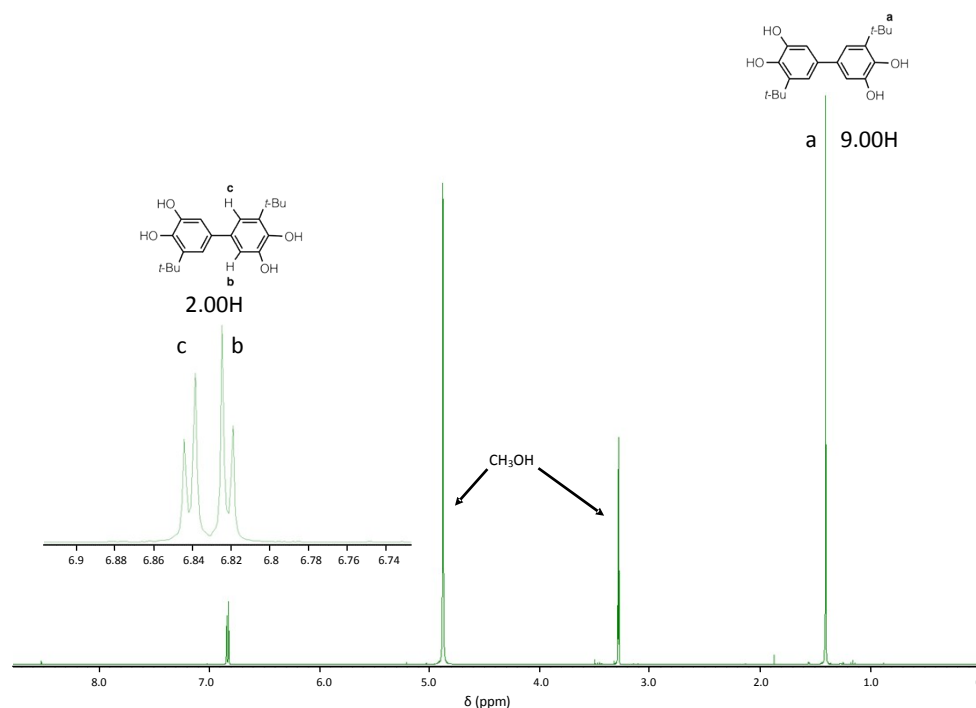

Figure S1. <sup>1</sup>H-NMR spectrum in CD<sub>3</sub>OD of H<sub>4</sub>BP

ESI-MS of  $[\text{Co}_2(\text{BP})(\text{tpa})_2](\text{PF}_6)_2$  (1):

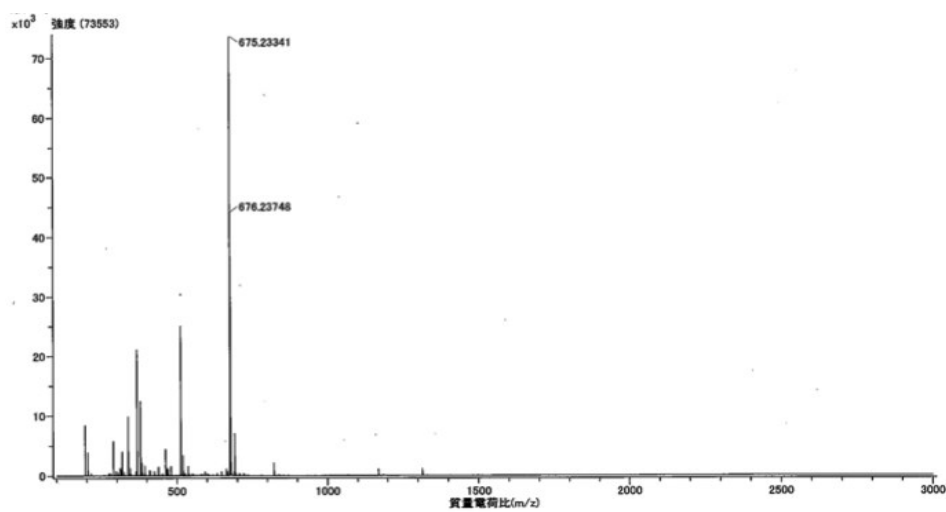

Figure S2. ESI-MS spectrum of  $[\text{Co}_2(\text{BP})(\text{tpa})_2](\text{PF}_6)_2$  (1)

ESI-MS of  $[\text{Co}_2(\text{BP})(\text{tpa})_2](\text{PF}_6)_3$  (2):

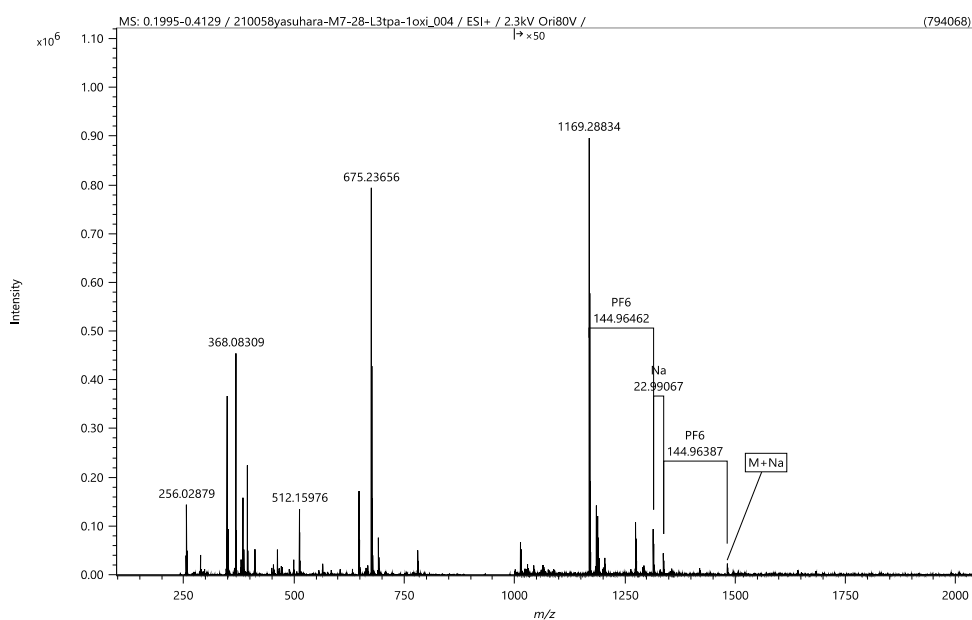

Figure S3. ESI-MS spectrum of  $[\text{Co}_2(\text{BP})(\text{tpa})_2](\text{PF}_6)_3$  (2)

ESI-MS of  $[\text{Co}_2(\text{BP})(\text{bpqa})_2](\text{PF}_6)_2$  (3):

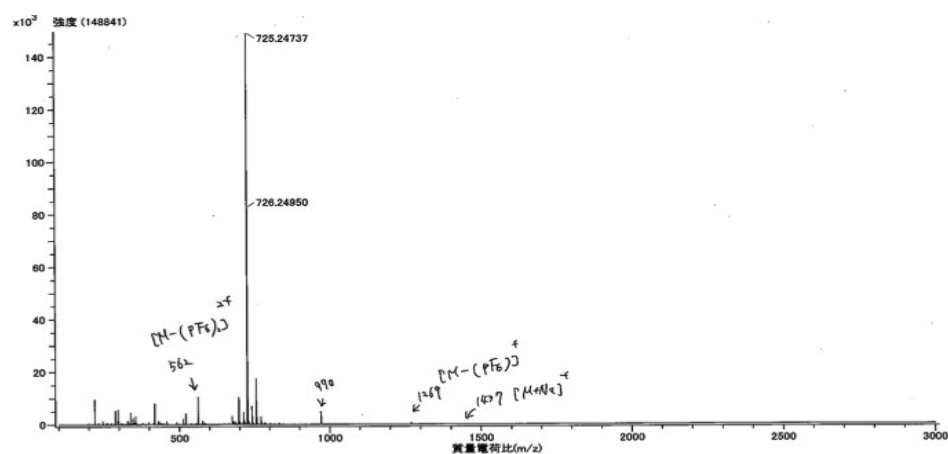

Figure S4. ESI-MS spectrum of  $[\text{Co}_2(\text{BP})(\text{bpqa})_2](\text{PF}_6)_2$  (3)

ESI-MS of  $[\text{Co}_2(\text{BP})(\text{pbqa})_2](\text{PF}_6)_2$  (4):

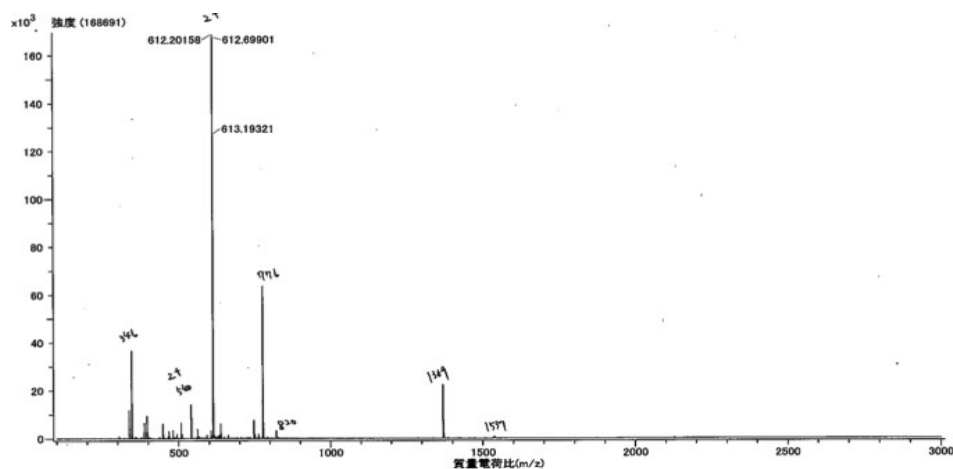

Figure S5. ESI-MS spectrum of  $[\text{Co}_2(\text{BP})(\text{pbqa})_2](\text{PF}_6)_2$  (4)

ESI-MS of  $[\text{Co}_2(\text{BP})(\text{tqa})_2](\text{PF}_6)_2$  (5):

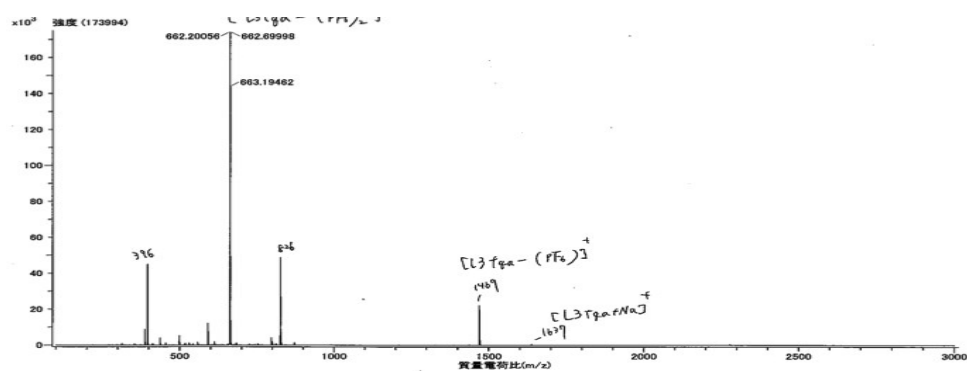

Figure S6. ESI-MS spectrum of  $[\text{Co}_2(\text{BP})(\text{tqa})_2](\text{PF}_6)_2$  (5)

## IR spectra

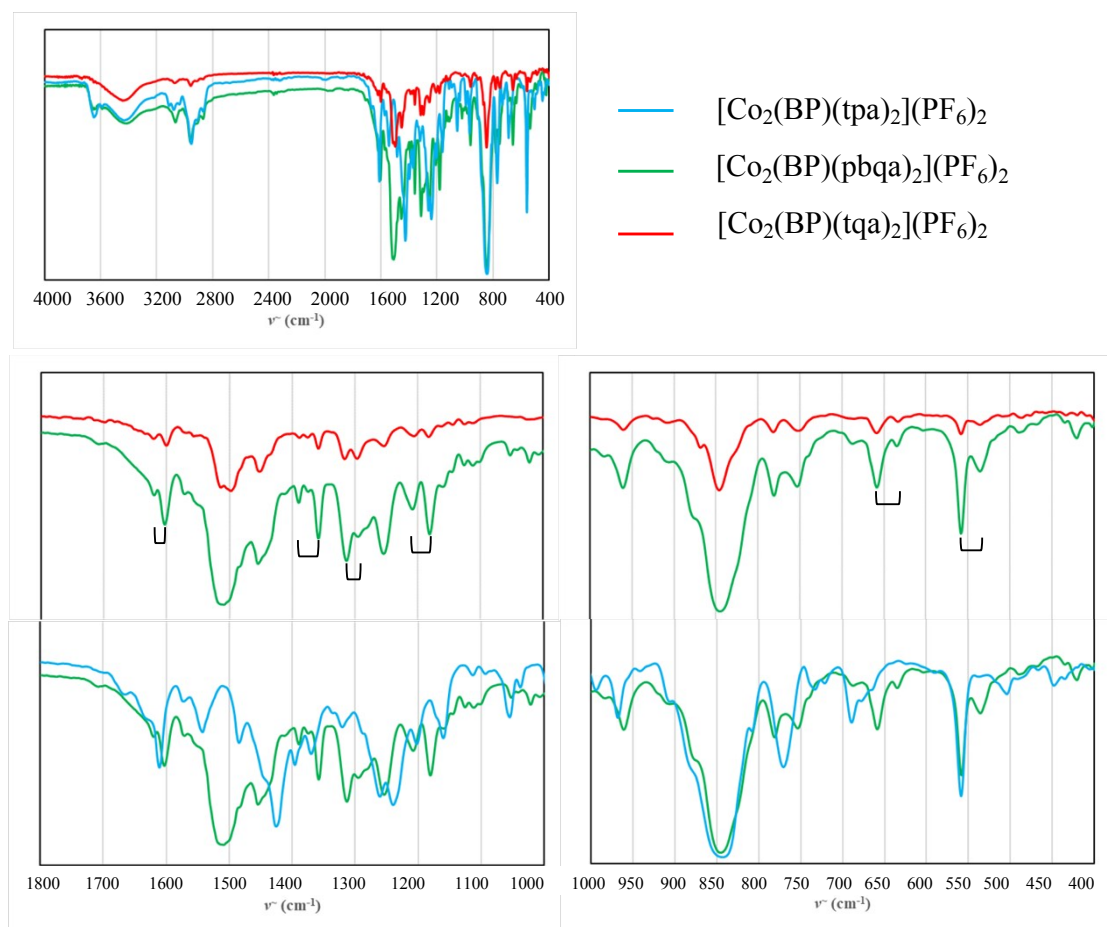

Figure S7. IR spectra of dinuclear Co complexes.

## UV-Vis-NIR spectra

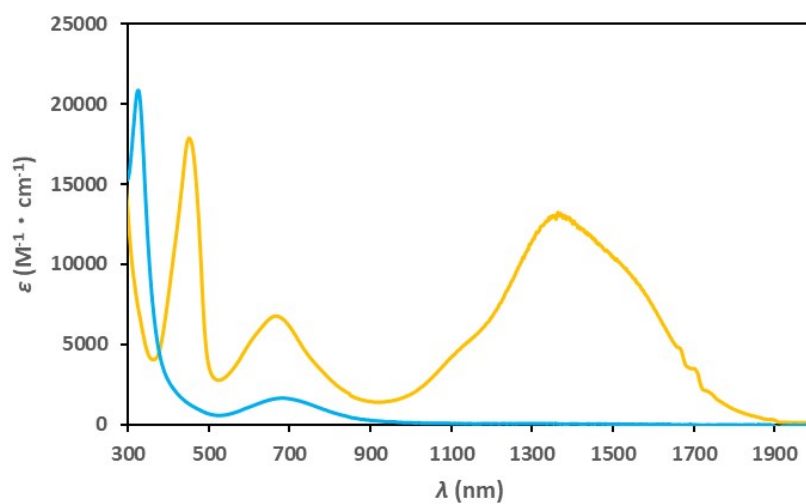

Figure S8. UV-Vis-NIR spectra of dinuclear Co complexes. blue line:  $[\text{Co}_2(\text{BP})(\text{tpa})_2](\text{PF}_6)_2$  (1), yellow line:  $[\text{Co}_2(\text{BP})(\text{tpa})_2](\text{PF}_6)_3$  (2) in acetonitrile solution at room temperature.

## EPR spectrum for complex (2)

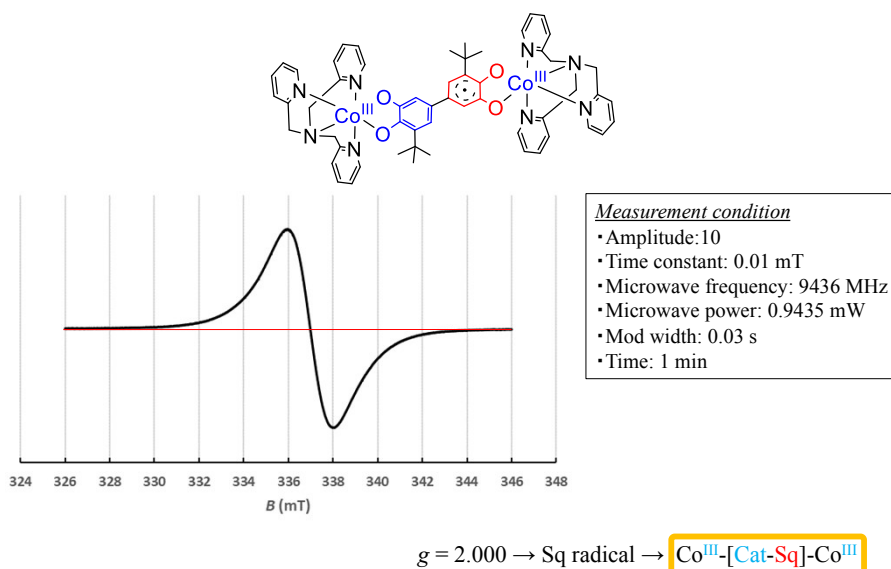

Figure S9. EPR spectrum of  $[\text{Co}_2(\text{BP})(\text{tpa})_2](\text{PF}_6)_3$  (2) at room temperature.

## IVCT parameters

Table S1. Mixed-valence and IVCT parameters for complex (2)

|                            | $\Delta diox$ | $H_{AB1}$        | $H_{AB2}$        | $H_{AB3}$ limit  | $2H_{AB1}/v_{max}$ | $2H_{AB2}/v_{max}$ | $\Gamma$ | MV Class |
|----------------------------|---------------|------------------|------------------|------------------|--------------------|--------------------|----------|----------|
|                            | mV            | $\text{cm}^{-1}$ | $\text{cm}^{-1}$ | $\text{cm}^{-1}$ |                    |                    |          |          |
| Complex (2)                | 377           | 1218             | 362              | 3645             | 0.33               | 0.10               | 0.47     | II-III   |
| Complex (5a) <sup>*)</sup> | 175           | 184              | 1990             | 2820             | 0.07               | 0.71               | -0.85    | II-III   |
| Pd complex <sup>**)</sup>  | 365           | 1530             | 3290             | 3710             | >0.41              | 0.89               | 0.52     | II-III   |

\*) G. K. Gransbury, *et al.*, *J. Am. Chem. Soc.*, 2020, **142**, 10692-10704.

\*\*\*) A. L. Poddel'sky, *et al.*, *Russ. J. Coord. Chem.*, 2012, **38**, 284-294.

## Analysis of various temperature in UV-Vis-NIR spectra

The thermal variation of the fraction of  $hs\text{Co}^{\text{II}}(\text{Sq})$  species determined by spectral deconvolution appears to sigmoidal profile (Figure S10).

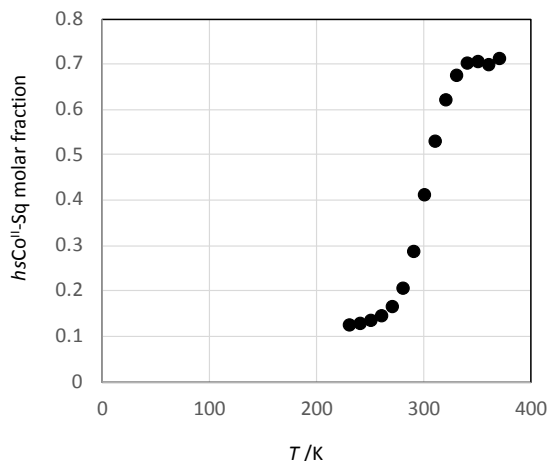

Figure S10. Temperature dependence of the molar fraction of  $hs\text{Co}^{\text{II}}\text{-Sq}$  for  $[\text{Co}_2(\text{BP})(\text{bpqa})_2](\text{PF}_6)_2$  (3).

## Cyclic voltammetry

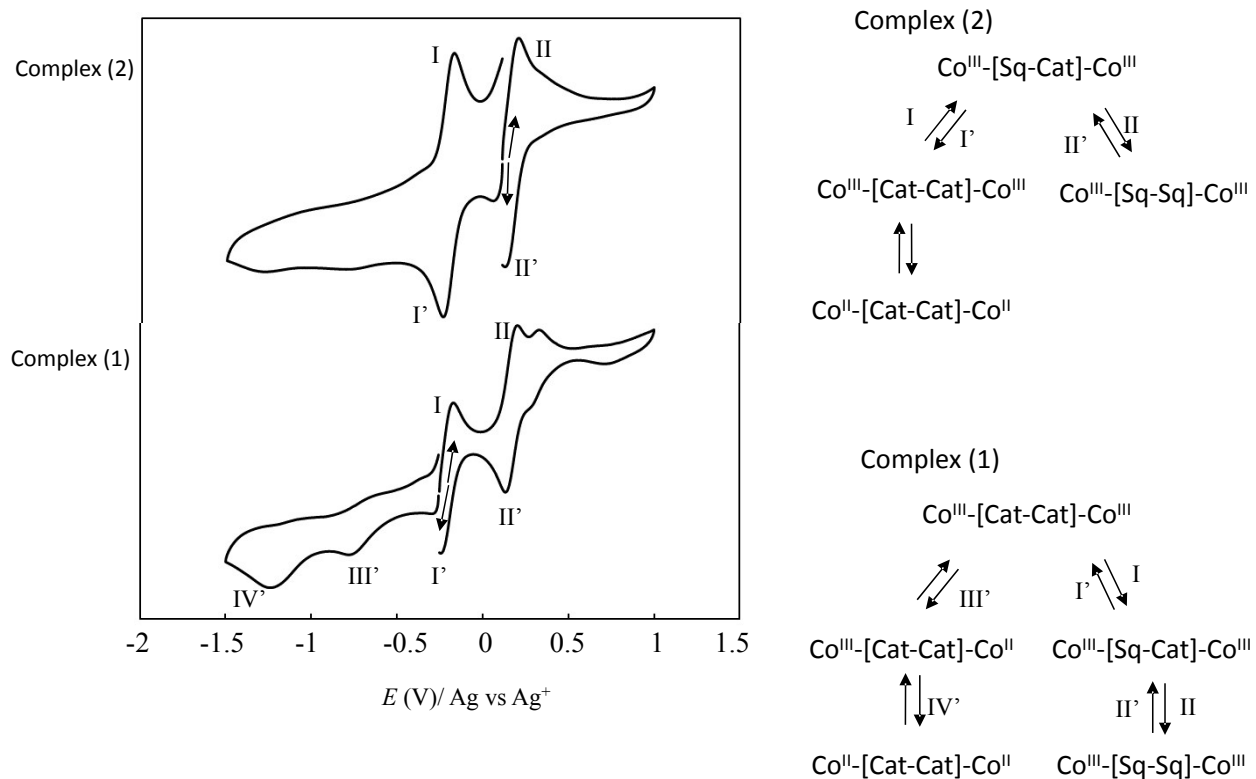

Figure S11. Cyclic voltammogram of complex(1) and (2) in acetonitrile solution at room temperature.

Table S2. Cyclic voltammetry for dinuclear Co complexes in  $\text{CH}_3\text{CN}$

| Complex | Rest potential /V | $E_{1/2} (V)/\Delta E_p(mV)$ |            |       |       |
|---------|-------------------|------------------------------|------------|-------|-------|
|         |                   | I/I'                         | II/II'     | III'  | IV'   |
| (1)     | -0.25             | -0.194 (73)                  | 0.169 (54) | ~-0.8 | ~-1.3 |
| (2)     | 0.108             | -0.203 (68)                  | 0.174 (85) | -     | -     |

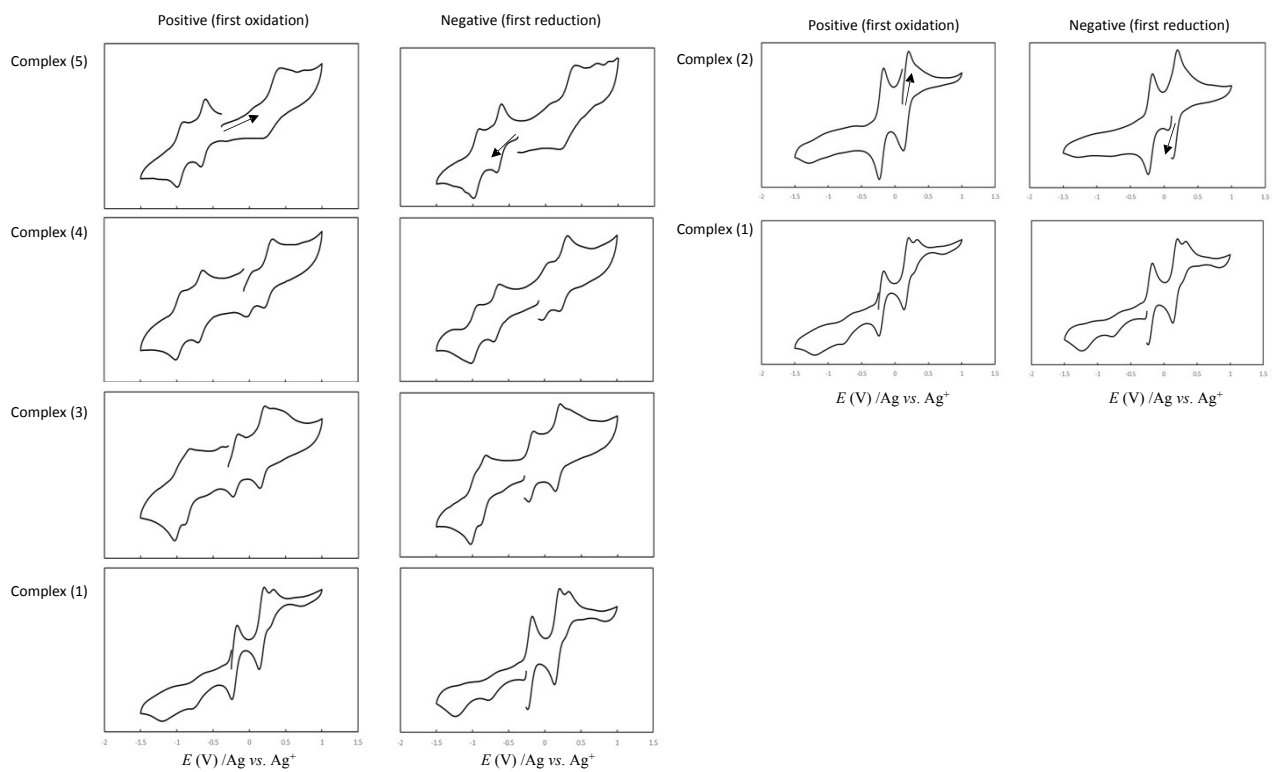

Figure S12. Cyclic voltammery of these complexes in acetonitrile at room temperature.



## Crystallography

Table S3. Crystallographic data for [Co<sub>2</sub>(BP)(tqa)<sub>2</sub>](PF<sub>6</sub>)<sub>2</sub> (5) and [Co<sub>2</sub>(BP)(pbqa)<sub>2</sub>](PF<sub>6</sub>)<sub>2</sub> (4)

|                                         | [Co <sub>2</sub> (BP)(tqa) <sub>2</sub> ](PF <sub>6</sub> ) <sub>2</sub> (5)                                                                         | [Co <sub>2</sub> (BP)(pbqa) <sub>2</sub> ](PF <sub>6</sub> ) <sub>2</sub> (4)                                                                        |
|-----------------------------------------|------------------------------------------------------------------------------------------------------------------------------------------------------|------------------------------------------------------------------------------------------------------------------------------------------------------|
| Chemical formula                        | C <sub>80</sub> H <sub>70</sub> Co <sub>2</sub> N <sub>8</sub> O <sub>4</sub> F <sub>12</sub> P <sub>2</sub> ·<br>3(C <sub>3</sub> H <sub>6</sub> O) | C <sub>72</sub> H <sub>66</sub> Co <sub>2</sub> N <sub>8</sub> O <sub>4</sub> F <sub>12</sub> P <sub>2</sub> ·<br>2(C <sub>3</sub> H <sub>6</sub> O) |
| Formula weight                          | 1963.70                                                                                                                                              | 1863.59                                                                                                                                              |
| Crystal system                          | monoclinic                                                                                                                                           | monoclinic                                                                                                                                           |
| Space group                             | <i>P</i> 21/ <i>m</i>                                                                                                                                | <i>P</i> 21/ <i>m</i>                                                                                                                                |
| Lattice Parameters                      |                                                                                                                                                      |                                                                                                                                                      |
| <i>a</i> /Å                             | 9.2480(3)                                                                                                                                            | 9.1110(4)                                                                                                                                            |
| <i>b</i> /Å                             | 41.0134(12)                                                                                                                                          | 41.1206(10)                                                                                                                                          |
| <i>c</i> /Å                             | 12.2659(5)                                                                                                                                           | 12.1350(3)                                                                                                                                           |
| $\beta$ /°                              | 103.376(4)                                                                                                                                           | 102.590(3)                                                                                                                                           |
| Unit Cell Volume                        |                                                                                                                                                      |                                                                                                                                                      |
| <i>V</i> /Å <sup>3</sup>                | 4526.2(3)                                                                                                                                            | 4437.1(3)                                                                                                                                            |
| <i>Z</i>                                | 2                                                                                                                                                    | 2                                                                                                                                                    |
| $\mu$ (Mo-K $\alpha$ )/cm <sup>-1</sup> | 0.71073                                                                                                                                              | 0.71073                                                                                                                                              |
| No. reflections measured                | 10397                                                                                                                                                | 10309                                                                                                                                                |
| No. observed reflections                | 6921                                                                                                                                                 | 8386                                                                                                                                                 |
| [ <i>I</i> > 2 $\sigma$ ( <i>I</i> )]   |                                                                                                                                                      |                                                                                                                                                      |
| <i>R</i> <i>I</i>                       | 0.0636                                                                                                                                               | 0.1069                                                                                                                                               |
| <i>WR</i> <sub>2</sub>                  | 0.1717                                                                                                                                               | 0.2344                                                                                                                                               |
| T/K                                     | 100                                                                                                                                                  | 100                                                                                                                                                  |
| GOF                                     | 1.009                                                                                                                                                | 1.128                                                                                                                                                |
| Max/Min residual electron densities     | 0.562/-0.529                                                                                                                                         | 0.709/-0.428                                                                                                                                         |
| Measurement                             | Rigaku XtaLAB P200                                                                                                                                   | Rigaku XtaLAB P200                                                                                                                                   |
| Programs systems                        | SHELXL 2018                                                                                                                                          | SHELXL 2018                                                                                                                                          |
| Structure determination                 | Olex 2                                                                                                                                               | Olex 2                                                                                                                                               |
| CCDC deposition number                  | 2067474                                                                                                                                              | 2067516                                                                                                                                              |

$$R = \frac{\sum ||F_o| - |F_c||}{\sum |F_o|}, R_w = \left[ \frac{\sum \omega (F_o^2 - F_c^2)^2}{\sum \omega (F_o^2)^2} \right]^{1/2}$$

Table S4. Selected distances (Å) and angles (°) for [Co<sub>2</sub>(BP)(pbqa)<sub>2</sub>](PF<sub>6</sub>)<sub>2</sub> (4)

| Bond      | Distances (Å) | Bond      | Distances (Å) |
|-----------|---------------|-----------|---------------|
| Co1-O1    | 2.145(3)      | Co1-O2    | 1.973(3)      |
| Co1-N1    | 2.141(4)      | Co1-N2    | 2.166(5)      |
| Co1-N3    | 2.164(5)      | Co1-N4    | 2.139(3)      |
| C1-O2     | 1.300(6)      | C6-O1     | 1.256(5)      |
| C1-C2     | 1.380(6)      | C2-C3     | 1.400(6)      |
| C3-C4     | 1.436(6)      | C4-C5     | 1.359(6)      |
| C5-C6     | 1.446(6)      | C6-C1     | 1.467(6)      |
| Bond      | Angles (°)    | Bond      | Angles (°)    |
| O1-Co1-O2 | 79.3(1)       | O2-Co1-N4 | 104.5 (1)     |
| N4-Co1-N1 | 82.8(1)       | N1-Co1-O1 | 93.3(1)       |
| N2-Co1-N3 | 156.1(2)      |           |               |

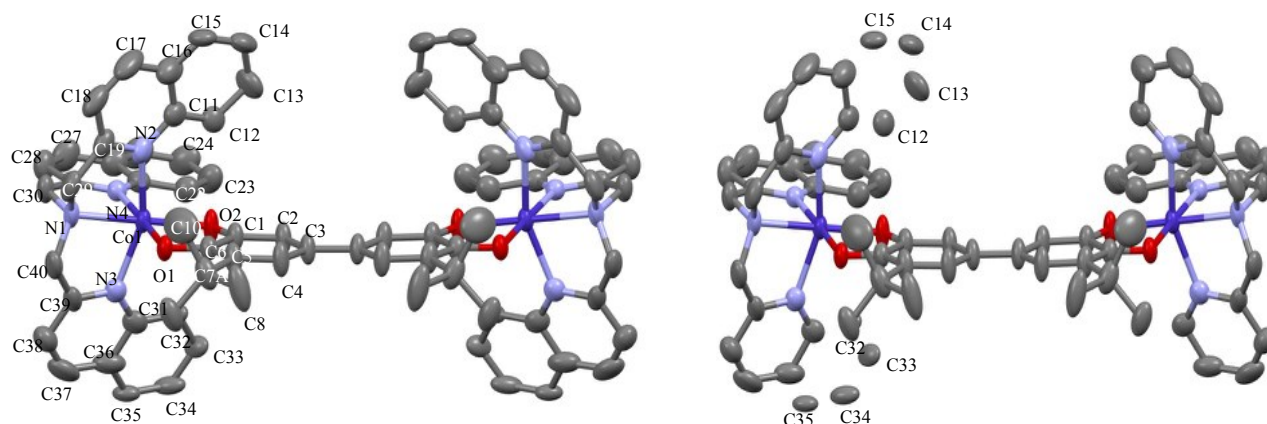

Figure S13. Perspective view of the complex cation in [Co<sub>2</sub>(BP)(pbqa)<sub>2</sub>](PF<sub>6</sub>)<sub>2</sub> (4) showing 50% thermal ellipsoids. Hydrogen atoms and the PF<sub>6</sub> anions are omitted for the sake of clarity. Right: drawing the disorder axial quinoline rings (C12~C15 and C32~C35) due to structural rearrangement of complex.

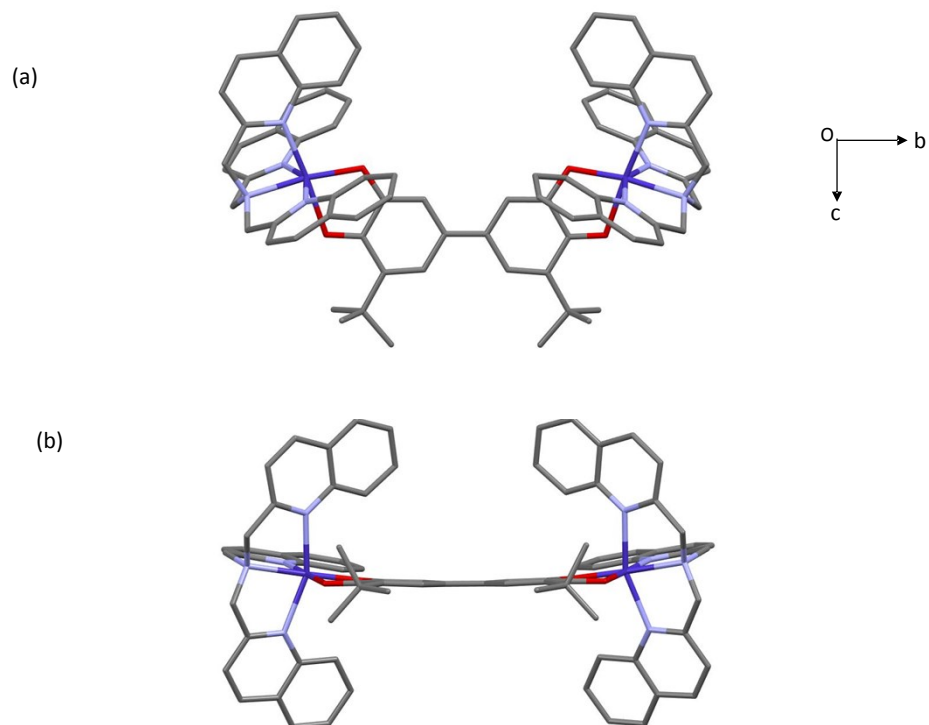

Figure S14. Crystal structure of  $[\text{Co}_2(\text{BP})(\text{pbqa})_2](\text{PF}_6)_2$  (**4**). Hydrogen atoms and the  $\text{PF}_6$  anions are omitted for the sake of clarity. (a) top view (b) side view.

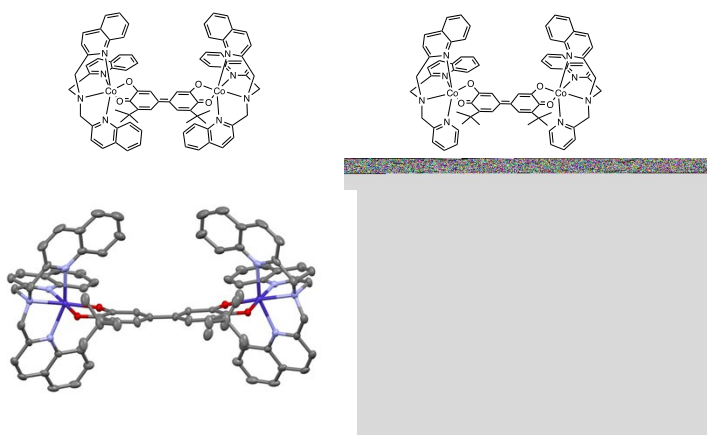

Figure S15. Compared of  $[\text{Co}_2(\text{BP})(\text{tqa})_2](\text{PF}_6)_2$  (**5**) (left) and  $[\text{Co}_2(\text{BP})(\text{pbqa})_2](\text{PF}_6)_2$  (**4**) (right).

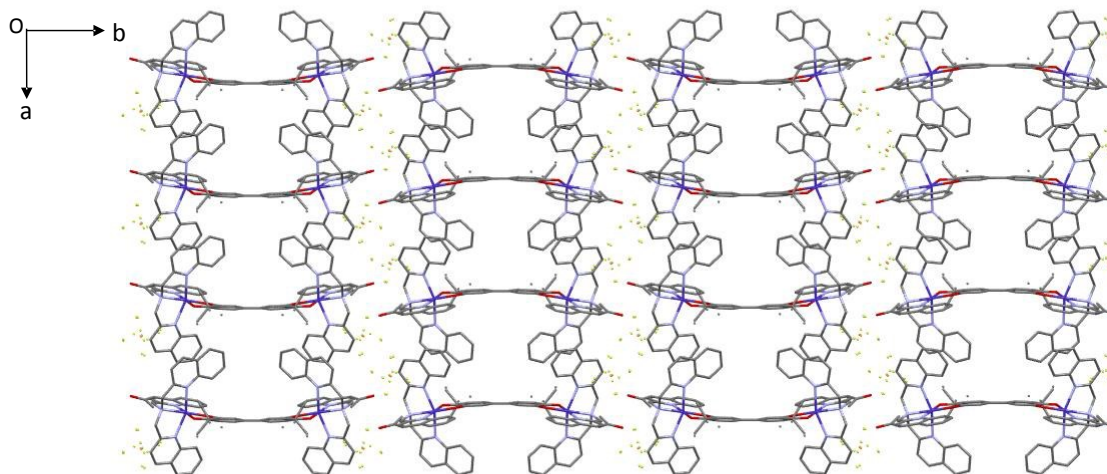

Figure S16. Crystal packing structure of  $[\text{Co}_2(\text{BP})(\text{tqa})_2](\text{PF}_6)_2$  (**5**). The upper and lower bent di-nuclear cobalt complexes's structure layers are alternative arranged, and acetone and  $\text{PF}_6^-$  counter anions are pretend between the layers.

### Metrical oxidation state (MOS) calculation

For complex (**4**), dioxolene C-C and C-O bond lengths are correlated to the ligand oxidation state, such that a least-squares fit enables assignment of an apparent metrical oxidation state (MOS, Brown). Catecholite ligands have a MOS of around -0.947 and are characterized as having shorter C-O bonds and longer C-C bonds. Complex (**4**) is assigned  $\text{Co}^{\text{II}}\text{-}[\text{Sq-Sq}]\text{-Co}^{\text{II}}$  in the solid state. To determine the Co oxidation state, we used the Co-O, Co-N<sub>amine</sub>, and Co-N<sub>qn</sub> bond lengths and octahedral distortion parameter. The calculated  $\Sigma$

index ( $98.3, \Sigma = \sum_{i=1}^{12} |90 - \alpha_i|$  where  $\alpha_i$  are the 12 *cis*-O/N-Co-O/N angles about the cobalt atom.) represents the distortion of a coordination environment from an ideal polyhedron. Co(II) has long metal-ligand bonds and distorted octahedral geometries compared to Co(III).

Table S5. MOS values for complex (**4**)

| Instructions for using the Metrical Oxidation State Calculator:                                                                                                                                                                                                                                                                                                                                                                                                                                                                                                     |       |             |       |           |           |       |            |           |            |            |            |            |            |            |            |
|---------------------------------------------------------------------------------------------------------------------------------------------------------------------------------------------------------------------------------------------------------------------------------------------------------------------------------------------------------------------------------------------------------------------------------------------------------------------------------------------------------------------------------------------------------------------|-------|-------------|-------|-----------|-----------|-------|------------|-----------|------------|------------|------------|------------|------------|------------|------------|
| Enter the measured bond distances in the appropriate columns C-G according to the numbering scheme at left. The two C-O distances are averaged in cell C, the C2-C3 and C3-C6 distances are averaged in cell E, and the C3-C4 and C5-C6 distances are averaged in cell F. Then enter a guess for the oxidation state of the ligand into column I. Copy the formulas from line 12, columns J-Q, and use Solver to minimize the value in column O by varying the value in column I. The metrical oxidation state will be in column I, and its <i>esd</i> in column Q. |       |             |       |           |           |       |            |           |            |            |            |            |            |            |            |
| Compound                                                                                                                                                                                                                                                                                                                                                                                                                                                                                                                                                            | Metal | C-O average | C1-C2 | C2-C3 avg | C3-C4 avg | C4-C5 | Calc. MOS  | Calc C-O  | Calc C1-C2 | Calc C2-C3 | Calc C3-C4 | Calc C4-C5 | sum of sqp | rmsd       | esd        |
| BEF91UF                                                                                                                                                                                                                                                                                                                                                                                                                                                                                                                                                             | CoII  | 1.278       | 1.467 | 1.413     | 1.3795    | 1.436 | -0.9465749 | 1.2820923 | 1.46272641 | 1.42736454 | 1.36742924 | 1.43188427 | 0.00040401 | 0.00868899 | 0.08586416 |
| pbqa                                                                                                                                                                                                                                                                                                                                                                                                                                                                                                                                                                | C1-O  | 1.3         |       |           |           |       |            |           |            |            |            |            |            |            |            |
|                                                                                                                                                                                                                                                                                                                                                                                                                                                                                                                                                                     | C2-O  | 1.256       |       |           |           |       |            |           |            |            |            |            |            |            |            |
|                                                                                                                                                                                                                                                                                                                                                                                                                                                                                                                                                                     | C2-C3 | 1.38        |       |           |           |       |            |           |            |            |            |            |            |            |            |
|                                                                                                                                                                                                                                                                                                                                                                                                                                                                                                                                                                     | C3-C4 | 1.4         |       |           |           |       |            |           |            |            |            |            |            |            |            |
|                                                                                                                                                                                                                                                                                                                                                                                                                                                                                                                                                                     | C6-C5 | 1.436       |       |           |           |       |            |           |            |            |            |            |            |            |            |
|                                                                                                                                                                                                                                                                                                                                                                                                                                                                                                                                                                     | C5-C6 | 1.359       |       |           |           |       |            |           |            |            |            |            |            |            |            |
|                                                                                                                                                                                                                                                                                                                                                                                                                                                                                                                                                                     | C1-C2 | 1.467       |       |           |           |       |            |           |            |            |            |            |            |            |            |
|                                                                                                                                                                                                                                                                                                                                                                                                                                                                                                                                                                     | C1-C6 | 1.446       |       |           |           |       |            |           |            |            |            |            |            |            |            |

Table S6. MOS values for complex (5)

Instructions for using the Metrical Oxidation State Calculator:

Enter the measured bond distances in the appropriate columns C-G according to the numbering scheme at left. The two C-O distances are averaged in cell C, the C2-C3 and C3-C5 distances are averaged in cell E, and the C3-C4 and C5-C6 distances are averaged in cell F. Then enter a guess for the oxidation state of the ligand into column I. Copy the formulas from line 12, columns J-Q, and use Solver to minimize the value in column D by varying the value in column I. The metrical oxidation state will be in column I, and its *end* in column Q.

| Compound | Metal | C-O average | C1-C2 | C2-C3 avg | C3-C4 avg | C4-C5 | Calc. MOS  | Calc. C-O  | Calc. C3-C2 | Calc. C2-C3 | Calc. C3-C4 | Calc. C4-C5 | sum of sqs | rmsd       | end        |
|----------|-------|-------------|-------|-----------|-----------|-------|------------|------------|-------------|-------------|-------------|-------------|------------|------------|------------|
| BEFXUF   | CoII  | 1.369       | 1.491 | 1.433     | 1.3855    | 1.437 | -0.7799543 | 1.37052883 | 1.47493213  | 1.4331796   | 1.36362195  | 1.43963213  | 0.00115331 | 0.01518754 | 0.14100985 |
| sq       | C1-O  | 1.393       |       |           |           |       |            |            |             |             |             |             |            |            |            |
|          | C2-O  | 1.345       |       |           |           |       |            |            |             |             |             |             |            |            |            |
|          | C2-C3 | 1.372       |       |           |           |       |            |            |             |             |             |             |            |            |            |
|          | C3-C4 | 1.42        |       |           |           |       |            |            |             |             |             |             |            |            |            |
|          | C4-C5 | 1.437       |       |           |           |       |            |            |             |             |             |             |            |            |            |
|          | C5-C6 | 1.351       |       |           |           |       |            |            |             |             |             |             |            |            |            |
|          | C1-C2 | 1.491       |       |           |           |       |            |            |             |             |             |             |            |            |            |
|          | C1-C6 | 1.454       |       |           |           |       |            |            |             |             |             |             |            |            |            |

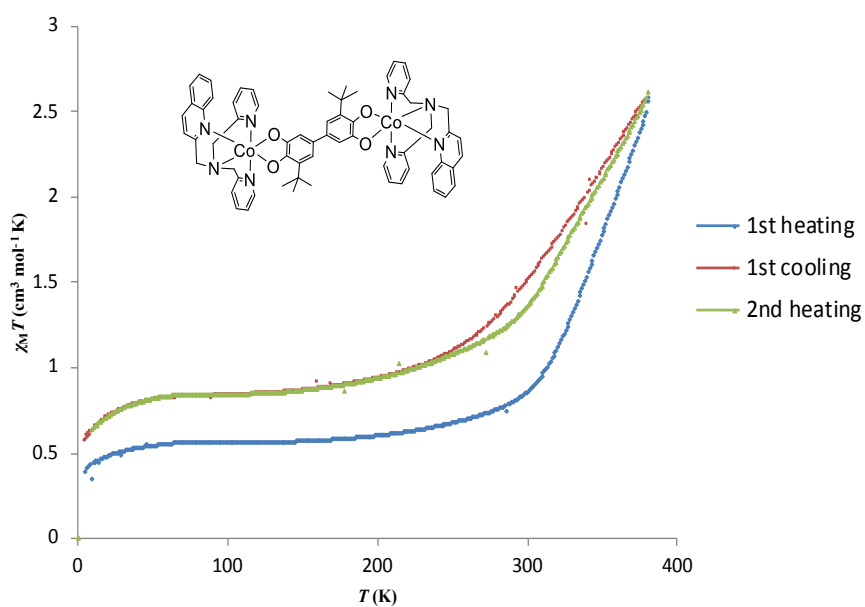

Figure S17. Magnetic susceptibility of  $[\text{Co}_2(\text{BP})(\text{bpqa})_2](\text{PF}_6)_2$  (**3**). Repeated data for heating and cooling for samples.
